# Supplementary material for: Drug Repurposing for Japanese Encephalitis Virus Infection by Systems Biology Methods
Source: Preprints.org preprint supplement (doi:10.20944/preprints201811.0478.v1), 2018-11-20
Supplement: Supplementary file 1 [file table S1.xlsx]

## Sheet: Supplementary Table 1
Supplementary Table 1: The functional genes participating in JEV infection ranked by GeneRank algorithm
Symbol	Description	GenBank
LRRK2	leucine rich repeat kinase 2	NM_198578.3
PHLPP1	PH domain and leucine rich repeat protein phosphatase 1	NM_194449.3
RIPK4	receptor interacting serine/threonine kinase 4	NM_020639.2
IFNB1	interferon beta 1	NM_002176.3
CXCL11	C-X-C motif chemokine ligand 11	NM_005409.4
CXCL10	C-X-C motif chemokine ligand 10	NM_001565.3
TRIM28	tripartite motif containing 28	NM_005762.2
CH25H	cholesterol 25-hydroxylase	NM_003956.3
TNFSF10	TNF superfamily member 10	NM_003810.3
OAS2	2'-5'-oligoadenylate synthetase 2	NM_016817.2
RSAD2	radical S-adenosyl methionine domain containing 2	NM_080657.4
IFIH1	interferon induced with helicase C domain 1	NM_022168.4
OAS1	2'-5'-oligoadenylate synthetase 1	NM_016816.3
CCL5	C-C motif chemokine ligand 5	NM_002985.2
IDO1	indoleamine 2,3-dioxygenase 1	NM_002164.5
PTGS2	prostaglandin-endoperoxide synthase 2	NM_000963.3
IFI44L	interferon induced protein 44 like	NM_006820.3
USP18	ubiquitin specific peptidase 18	NM_017414.3
OASL	2'-5'-oligoadenylate synthetase like	NM_003733.3
TP53	tumor protein p53	NM_001276760.1
GBP5	guanylate binding protein 5	NM_001134486.2
MX2	MX dynamin like GTPase 2	NM_002463.1
IL29	interleukin 29/interferon lambda 1	NM_172140.1
IFIT2	interferon induced protein with tetratricopeptide repeats 2	NM_001547.4
TRIM22	tripartite motif containing 22	NM_006074.4
PRKACA	protein kinase cAMP-activated catalytic subunit alpha	NM_002730.3
GNGT1	G protein subunit gamma transducin 1	NM_021955.4
PRKACB	protein kinase cAMP-activated catalytic subunit beta	NM_182948.3
GNG7	G protein subunit gamma 7	NM_052847.2
NCF2	neutrophil cytosolic factor 2	NM_000433.3
MX1	MX dynamin like GTPase 1	NM_001144925.2
PRKACG	protein kinase cAMP-activated catalytic subunit gamma	NM_002732.3
ISG20	interferon stimulated exonuclease gene 20	NM_002201.5
OAS3	2'-5'-oligoadenylate synthetase 3	NM_006187.3
ARRB1	arrestin beta 1	NM_004041.4
ARRB2	arrestin beta 2	NM_004313.3
PRDM10	PR/SET domain 10	NM_020228.2
KLF4	Kruppel like factor 4	NM_001314052.1
DDX58	DExD/H-box helicase 58	NM_014314.3
IFIT3	interferon induced protein with tetratricopeptide repeats 3	NM_001549.5
GNG13	G protein subunit gamma 13	NM_016541.2
XAF1	XIAP associated factor 1	NM_017523.4
IL6	interleukin 6	NM_000600.4
LRRN3	leucine rich repeat neuronal 3	NM_001099660.1
EPSTI1	epithelial stromal interaction 1	NM_001002264.3
ALB	albumin	NM_000477.6
HERC5	HECT and RLD domain containing E3 ubiquitin protein ligase 5	NM_016323.3
NEDD9	neural precursor cell expressed, developmentally down-regulated 9	NM_006403.3
IFITM1	interferon induced transmembrane protein 1	NM_003641.3
HERC6	HECT and RLD domain containing E3 ubiquitin protein ligase family member 6	NM_017912.3
IFIT1	interferon induced protein with tetratricopeptide repeats 1	NM_001548.4
AKT1	AKT serine/threonine kinase 1	NM_005163.2
IFI27	interferon alpha inducible protein 27	NM_001130080.2
GBP1	guanylate binding protein 1	NM_002053.2
GNAL	G protein subunit alpha L	NM_182978.3
SCIN	scinderin	NM_001112706.2
IRF7	interferon regulatory factor 7	NM_001572.4
SEMA3A	semaphorin 3A	NM_006080.2
HAS2	hyaluronan synthase 2	NM_005328.2
PARP9	poly(ADP-ribose) polymerase family member 9	NM_031458.2
KCNV1	potassium voltage-gated channel modifier subfamily V member 1	NM_014379.3
IFI44	interferon induced protein 44	NM_006417.4
ACLY	ATP citrate lyase	NM_001096.2
DHX58	DExH-box helicase 58	NM_024119.2
DDX60L	DExD/H-box 60 like	NM_001012967.2
IFI6	interferon alpha inducible protein 6	NM_002038.3
TOP2A	DNA topoisomerase II alpha	NM_001067.3
HSPA6	heat shock protein family A (Hsp70) member 6	NM_002155.4
JAK2	Janus kinase 2	NM_004972.3
BATF2	basic leucine zipper ATF-like transcription factor 2	NM_138456.3
ISG15	ISG15 ubiquitin-like modifier	NM_005101.4
SEMA3D	semaphorin 3D	NM_152754.2
IFI35	interferon induced protein 35	NM_005533.4
CMPK2	cytidine/uridine monophosphate kinase 2	NM_207315.3
RTP4	receptor transporter protein 4	NM_022147.2
FAS	Fas cell surface death receptor	NM_000043.5
IFIT5	interferon induced protein with tetratricopeptide repeats 5	NM_012420.2
SRC	SRC proto-oncogene, non-receptor tyrosine kinase	NM_005417.4
FGF2	fibroblast growth factor 2	NM_002006.5
STAT1	signal transducer and activator of transcription 1	NM_007315.3
TRIM21	tripartite motif containing 21	NM_003141.3
SP110	SP110 nuclear body protein	NM_004509.3
HLA-F	major histocompatibility complex, class I, F	NM_001098479.1
TLR3	toll like receptor 3	NM_003265.2
SAMD9	sterile alpha motif domain containing 9	NM_017654.3
UBE2L6	ubiquitin conjugating enzyme E2 L6	NM_004223.4
TOP2B	DNA topoisomerase II beta	NM_001330700.1
MAPK1	mitogen-activated protein kinase 1	NM_002745.4
VEGFA	vascular endothelial growth factor A	NM_001171623.1
JUN	Jun proto-oncogene, AP-1 transcription factor subunit	NM_002228.3
ESM1	endothelial cell specific molecule 1	NM_007036.4
NMI	N-myc and STAT interactor	NM_004688.2
HSPA6 /// HSPA7	heat shock protein family A (Hsp70) member 6	NM_002155.4
TAF1	TATA-box binding protein associated factor 1	NM_004606.4
GAPDH	glyceraldehyde-3-phosphate dehydrogenase	NM_002046.6
TNF	tumor necrosis factor	NM_000594.3
PARP14	poly(ADP-ribose) polymerase family member 14	NM_017554.2
ACTN2	actinin alpha 2	NM_001103.3
SAMD9L	sterile alpha motif domain containing 9 like	NM_152703.4
UBA52	ubiquitin A-52 residue ribosomal protein fusion product 1	NM_001033930.2
C1S	complement C1s	NM_201442.3
PARP12	poly(ADP-ribose) polymerase family member 12	NM_022750.3
MMP1	matrix metallopeptidase 1	NM_002421.3
SCN3A	sodium voltage-gated channel alpha subunit 3	NM_006922.3
DTX3L	deltex E3 ubiquitin ligase 3L	NM_138287.3
FAM46A	terminal nucleotidyltransferase 5A	NM_017633.2
EHMT2	euchromatic histone lysine methyltransferase 2	NM_001289413.1
PTGER4	prostaglandin E receptor 4	NM_000958.2
IRF9	interferon regulatory factor 9	NM_006084.4
MBOAT4	membrane bound O-acyltransferase domain containing 4	NM_001100916.1
RGAG1	retrotransposon gag domain containing 1	NM_020769.2
ACACB	acetyl-CoA carboxylase beta	NM_001093.3
IRF1	interferon regulatory factor 1	NM_002198.2
ATF3	activating transcription factor 3	NM_001674.3
PLSCR1	phospholipid scramblase 1	NM_021105.2
BAMBI	BMP and activin membrane bound inhibitor	NM_012342.2
DDX60	DExD/H-box helicase 60	NM_017631.5
IL1B	interleukin 1-beta	NM_000576.2
PPM1K	protein phosphatase Mg2+/Mn2+ dependent 1K	NM_152542.4
MAPK3	mitogen-activated protein kinase 3	NM_002746.2
MYC	MYC proto-oncogene, bHLH transcription factor	NM_002467.5
DDO	D-aspartate oxidase	NM_004032.2
IFI16	interferon gamma inducible protein 16	NM_001206567.1
UBC	ubiquitin C	NM_021009.6
CDC42	cell division cycle 42	NM_001791.3
GBP2	guanylate binding protein 2	NM_004120.4
C1R	complement C1r	NM_001733.6
CAD	carbamoyl-phosphate synthetase 2, aspartate transcarbamylase, and dihydroorotase	NM_004341.4
CCL20	C-C motif chemokine ligand 20	NM_004591.2
TGFB1	transforming growth factor beta 1	NM_000660.6
IFNA16	interferon alpha 16	NM_002173.3
PLA2G4A	phospholipase A2 group IVA	NM_024420.2
EHMT1	euchromatic histone lysine methyltransferase 1	NM_024757.4
BST2	bone marrow stromal cell antigen 2	NM_004335.3
EGFR	epidermal growth factor receptor	NM_005228.4
EGF	epidermal growth factor	NM_001963.5
TNFAIP3	TNF alpha induced protein 3	NM_001270508.1
HSP90AA1	heat shock protein 90 alpha family class A member 1	NM_001017963.2
CCL26	C-C motif chemokine ligand 26	NM_006072.4
HRAS	HRas proto-oncogene, GTPase	NM_005343.3
NLRC5	NLR family CARD domain containing 5	NM_032206.4
CTSS	cathepsin S	NM_004079.4
C17orf76//LRRC75A	Leucine-rich repeat-containing protein 75A	NM_001113567.2
CD274	CD274 molecule	NM_014143.3
SERPINB2	serpin family B member 2	NM_001143818.1
CALM2	calmodulin 2	NM_001305624.1
EP300	E1A binding protein p300	NM_001429.3
STAT2	signal transducer and activator of transcription 2	NM_005419.3
TRAF1	TNF receptor associated factor 1	NM_005658.4
HLA-B /// HLA-C	major histocompatibility complex, class I, B	NM_005514.7
GMPR	guanosine monophosphate reductase	NM_006877.3
CALM3	calmodulin 3	NM_005184.3
ARL4A	ADP ribosylation factor like GTPase 4A	NM_005738.4
PIK3CA	phosphatidylinositol-4,5-bisphosphate 3-kinase catalytic subunit alpha	NM_006218.3
UBB	ubiquitin B	NM_018955.3
SPTAN1	spectrin alpha, non-erythrocytic 1	NM_001130438.2
SP100	SP100 nuclear antigen	NM_001080391.1
GBP3	guanylate binding protein 3	NM_018284.2
UMPS	uridine monophosphate synthetase	NM_000373.3
ACTB	actin beta	NM_001101.4
CALM1	calmodulin 1	NM_001363670.1
ABCC9	ATP binding cassette subfamily C member 9	NM_005691.3
GART	phosphoribosylaminoimidazole synthetase (GART)	NM_000819.4
SAMHD1	SAM and HD domain containing deoxynucleoside triphosphate triphosphohydrolase 1	NM_015474.3
PMAIP1	phorbol-12-myristate-13-acetate-induced protein 1	NM_021127.2
NR2F1	nuclear receptor subfamily 2 group F member 1	NM_005654.5
TMEM140	transmembrane protein 140	NM_018295.4
CASP1	caspase 1	NM_001257118.2
TNFSF13B	TNF superfamily member 13b	NM_006573.4
NOL4	nucleolar protein 4	NM_003787.4
CASP3	caspase 3	NM_004346.3
RPS27A	ribosomal protein S27a	NM_002954.5
RHOA	ras homolog family member A	NM_001664.3
HLA-C	major histocompatibility complex, class I, C	NM_002117.5
EIF2AK2	eukaryotic translation initiation factor 2 alpha kinase 2	NM_002759.3
ZNF442	zinc finger protein 442	NM_030824.2
CTNNB1	catenin beta 1	NM_001904.3
UBA7	ubiquitin like modifier activating enzyme 7	NM_003335.2
ESR1	estrogen receptor 1	NM_000125.3
PIK3CB	phosphatidylinositol-4,5-bisphosphate 3-kinase catalytic subunit beta	NM_006219.2
CDH1	cadherin 1	NM_004360.4
GMPS	guanine monophosphate synthase	NM_003875.2
PLEKHA4	pleckstrin homology domain containing A4	NM_020904.2
KYNU	kynureninase	NM_003937.2
APP	amyloid beta precursor protein	NM_000484.3
IL15	interleukin 15	NM_172175.2
SP1	Sp1 transcription factor	NM_138473.2
TAP1	transporter 1, ATP binding cassette subfamily B member (TAP1)	NM_000593.5
HLA-A	major histocompatibility complex, class I, A	NM_002116.7
LRGUK	leucine rich repeats and guanylate kinase domain containing	NM_001365700.1
FST	follistatin (FST)	NM_006350.3
PHF11	PHD finger protein 11	NM_001040443.2
TRIM5	tripartite motif containing 5	NM_033092.2
LAP3	leucine aminopeptidase 3	NM_015907.2
IFNA17	interferon alpha 17	NM_021268.2
NR4A2	nuclear receptor subfamily 4 group A member 2	NM_006186.3
HLA-B	major histocompatibility complex, class I, B (HLA-B)	NM_005514.7
FAM43A	family with sequence similarity 43 member A	NM_153690.4
IRF2	interferon regulatory factor 2	NM_002199.3
PIK3CG	phosphatidylinositol-4,5-bisphosphate 3-kinase catalytic subunit gamma	NM_002649.3
TDRD7	tudor domain containing 7	NM_014290.2
STAT3	signal transducer and activator of transcription 3	NM_139276.2
PCDH17	protocadherin 17	NM_001040429.2
C3AR1	complement C3a receptor 1	NM_004054.3
SIN3A	SIN3 transcription regulator family member A	NM_001145358.1
KIT	KIT proto-oncogene receptor tyrosine kinase	NM_000222.2
IMPDH2	inosine monophosphate dehydrogenase 2	NM_000884.2
IL7R	interleukin 7 receptor	NM_002185.4
PIKFYVE	phosphoinositide kinase, FYVE-type zinc finger containing	NM_015040.3
RASGRP3	RAS guanyl releasing protein 3	NM_001139488.1
TRIM34 /// TRIM6-TRIM34	tripartite motif containing 34	NM_021616.5
LYPD1	LY6/PLAUR domain containing 1	NM_144586.6
MAPK14	mitogen-activated protein kinase 14	NM_001315.2
BCL2A1	BCL2 related protein A1	NM_004049.3
ZC3HAV1	zinc finger CCCH-type containing, antiviral 1	NM_020119.3
CFB	complement factor B	NM_001710.5
GNB4	G protein subunit beta 4	NM_021629.3
PSMB9	proteasome subunit beta 9	NM_002800.4
PSMB8	proteasome subunit beta 8	NM_004159.4
NFKBIA	NFKB inhibitor alpha	NM_020529.2
F3	coagulation factor III, tissue factor	NM_001993.4
PPP1R15A	protein phosphatase 1 regulatory subunit 15A	NM_014330.3
ACTA1	actin, alpha 1, skeletal muscle	NM_001100.3
BCL2	BCL2, apoptosis regulator	NM_000633.2
NOTCH1	notch 1	NM_017617.5
