# Supplementary material for: Drug Repurposing for Japanese Encephalitis Virus Infection by Systems Biology Methods
Source: Preprints.org preprint supplement (doi:10.20944/preprints201811.0478.v1), 2018-11-20
Supplement: Supplementary file 2 [file table S2.xlsx]

## Sheet: Supplementary Table 2
Supplementary Table 2: The potential anti-JEV agents discovered by GeneRank algorithm
Agents	Evidence in JEV treatment
ACETYLSALICYLIC ACID	Y
ADALIMUMAB	N
AMSACRINE	N
ANDROGRAPHOLIDE	N
APREMILAST	N
APRINDINE	N
ARSENIC TRIOXIDE	N
AV411	N
BAY80-6946	N
BEPRIDIL	N
BEVACIZUMAB	N
BGJ398	N
BINIMETINIB	N
BORTEZOMIB	N
BUPARLISIB HYDROCHLORIDE	N
BYL719	N
CAFFEINE	N
CALCIUM	N
CALCIUM CITRATE	N
CALCIUM PHOSPHATE	N
CARBAMAZEPINE	N
CELECOXIB	N
CETUXIMAB	N
CH5132799	N
CHLORPROMAZINE	Y
CINCHOCAINE	N
CITRIC ACID	N
COPPER	N
CRX-139	N
CUDC-101	N
CURCUMIN	Y
DACTOLISIB	N
DASATINIB	N
DEXIBUPROFEN	N
DICLOFENAC	N
DILMAPIMOD	N
DOXORUBICIN	N
DS-7423	N
DUVELISIB	N
ENMD-2076	N
ERLOTINIB	N
ETANERCEPT	Y
EVEROLIMUS	N
FELODIPINE	N
FLUNARIZINE	N
FLUPHENAZINE	N
GDC-0941	N
GDC-0980	N
GEFITINIB	N
GENISTEIN	Y
GLUCOSAMINE	N
GSK2126458	N
GSK2636771	N
HMPL-004	N
IBUPROFEN	N
ISOFLURANE	N
JAK3 INHIBITOR II	N
KHL-9114	N
LENALIDOMIDE	N
LOPERAMIDE	N
LY 294002	N
MELATONIN	N
MINOCYCLINE	Y
MOMELOTINIB	N
MYRISTIC ACID	N
NICARDIPINE	N
NIFEDIPINE	N
N-TRIMETHYLLYSINE	N
OXALIPLATIN	N
PACLITAXEL	N
PANITUMUMAB	N
PERPHENAZINE	N
PF-4691502	N
PHENOXYBENZAMINE	N
PHOSPHONOTHREONINE	N
PI 3-KG INHIBITOR	N
PI-103	N
PIMOZIDE	N
PKI-587	N
PRENYLAMINE	N
PROMETHAZINE	N
PSEUDOEPHEDRINE	N
PWT33597	N
PX-866	N
QUERCETIN	Y
RESVERATROL	N
RIBAVIRIN	Y
RIGOSERTIB	N
SF1126	N
SOPHORETIN	N
SORAFENIB	N
TALMAPIMOD	N
TEMSIROLIMUS	N
TG-100-115	N
THALIDOMIDE	N
TRASTUZUMAB	N
TRIFLUOPERAZINE	N
VALPROIC ACID	Y
VANDETANIB	N
VX-702	N
XL147	N
XL765	N
ZSTK474	N
