# Supplementary material for: Drug Repurposing for Japanese Encephalitis Virus Infection by Systems Biology Methods
Source: Preprints.org preprint supplement (doi:10.20944/preprints201811.0478.v1), 2018-11-20
Supplement: Supplementary file 3 [file table S3.xlsx]

## Sheet: Supplementary Table 3
Supplementary Table 3: The significant sub-networks associated with encephalitis
Subnetwork index	Components
1	ATM	BIRC7	NOL7	NRBP1	PHF1	PKNOX1	STK11
2	ACACA	ARHGAP1	LARS	PC	PSMD10
3	ADAR	FOXG1	IFI16	PSMA7	WDR46
4	LMO4	SEC23IP	SLAMF1	TPM3	VPS52
5	PSMB8	PSMB9	TAP1	TAP2	TAPBP
6	BRD2	BRD7	RPLP1	RPS18
7	DLEU1	QKI	SETDB1	TXNDC9
8	HAX1	NDUFS2	NTM	SDHC
9	HLA-DMA	HLA-DMB	HLA-DOA	HLA-DRB1
10	ANKS1A	ARHGAP10	PAK2
11	ASAH2	KIFC1	PARD6B
12	B4GALT3	HLA-DPA1	HLA-DPB1
13	CUTA	PPP4R2	SMEK2
14	EEF1A2	FRAS1	NXPH2
15	FOXP4	NRAS	RGL2
16	HLA-DQA1	HLA-DQA2	HLA-DQB1
