# Supplementary material for: Drug Repurposing for Japanese Encephalitis Virus Infection by Systems Biology Methods
Source: Preprints.org preprint supplement (doi:10.20944/preprints201811.0478.v1), 2018-11-20
Supplement: Supplementary file 4 [file table S4.xlsx]

## Sheet: Supplementary Table 4
Supplementary Table 4: The potential anti-JEV agents discovered by HotNet2 algorithm
Serial Number	Agents
1	AMOXICILLIN
2	AT-406
3	BIOTIN
4	BORTEZOMIB
5	CAFFEINE
6	CARFILZOMIB
7	CLAVULANATE
8	DOXORUBICIN
9	GDC-0152
10	GLATIRAMER ACETATE
11	INSULIN PORK
12	INTERFERON BETA-1A
13	INTERFERON BETA-1B
14	N-ACETYLGLUCOSAMINE
15	NIRAPARIB
16	OLAPARIB
17	PYRUVIC ACID
18	RUCAPARIB
19	TALAZOPARI
20	VELIPARIB
